# Supplementary material for: The Influence of Acid Whey on the Lipid Composition and Oxidative Stability of Organic Uncured Fermented Bacon after Production and during Chilling Storage
Source: MDPI journal article supplement (doi:10.3390/antiox10111711), 2021-10-27
Supplement: s1 [file s1]

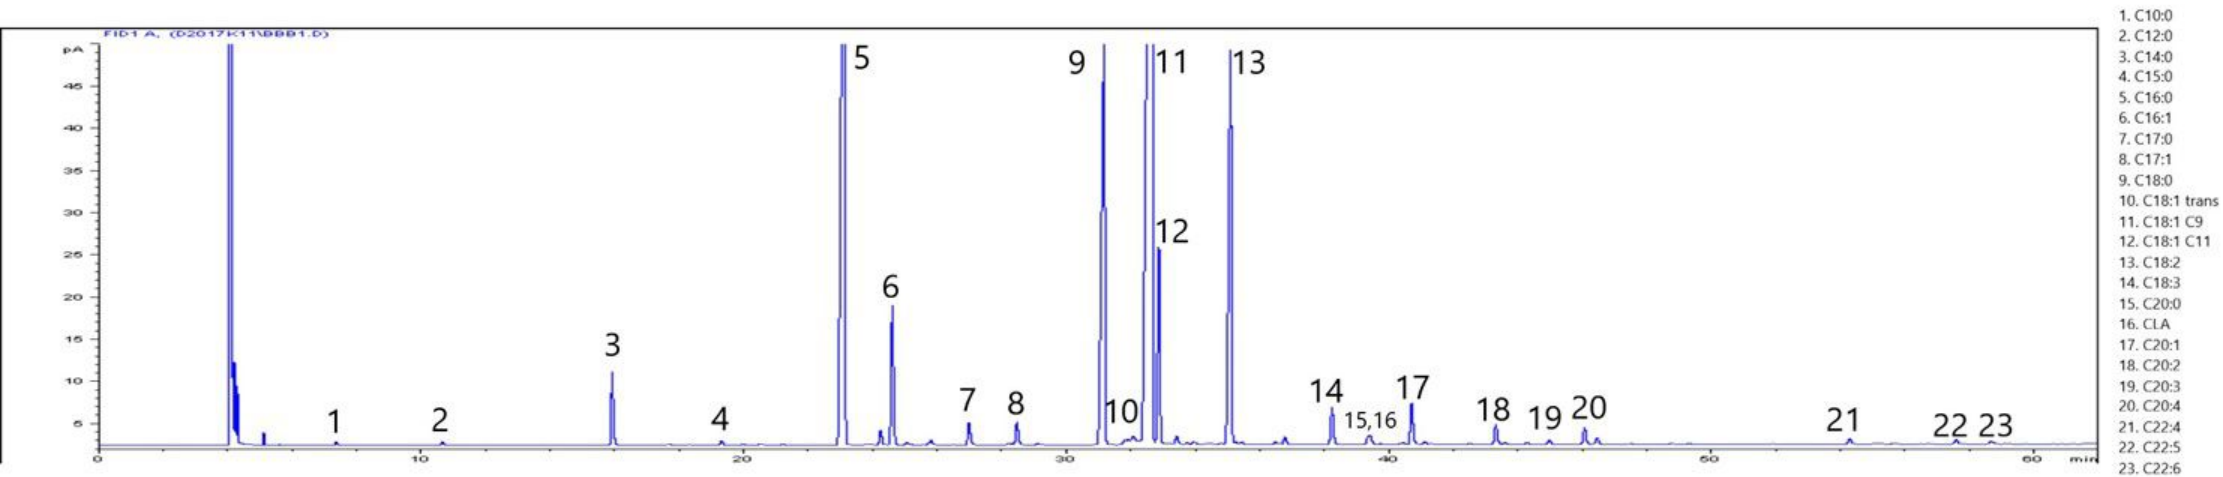

**Figure S1.** Sample chromatogram of fatty acids of the fermented pork bacon with the use of acid whey (AW) after 4 weeks of storage.

**Table S1.** Sensory quality discriminants of experimental bacons after fermentation (means  $\pm$  standard deviation).

| Sensory quality features | Treatment | Intensity [0-10 c.u]         |
|--------------------------|-----------|------------------------------|
| Smoked meat flavour      | C         | 7.58 $\pm$ 0.59 <sup>b</sup> |
|                          | T         | 6.29 $\pm$ 1.02 <sup>a</sup> |
|                          | AW        | 6.65 $\pm$ 1.14 <sup>b</sup> |
| Dried meat flavour       | C         | 5.80 $\pm$ 1.45 <sup>a</sup> |
|                          | T         | 7.77 $\pm$ 1.24 <sup>c</sup> |
|                          | AW        | 5.33 $\pm$ 1.25 <sup>b</sup> |
| Salty flavour            | C         | 4.18 $\pm$ 1.58 <sup>a</sup> |
|                          | T         | 4.50 $\pm$ 2.93 <sup>a</sup> |
|                          | AW        | 3.67 $\pm$ 1.44 <sup>a</sup> |
| Fatty flavour            | C         | 6.96 $\pm$ 1.44 <sup>a</sup> |
|                          | T         | 8.73 $\pm$ 0.90 <sup>b</sup> |
|                          | AW        | 7.94 $\pm$ 1.33 <sup>b</sup> |
| Acid flavour             | C         | 1.49 $\pm$ 1.42 <sup>a</sup> |
|                          | T         | 1.53 $\pm$ 1.15 <sup>a</sup> |
|                          | AW        | 2.31 $\pm$ 1.46 <sup>a</sup> |
| Bitter flavour           | C         | 1.65 $\pm$ 1.97 <sup>a</sup> |
|                          | T         | 1.56 $\pm$ 2.53 <sup>a</sup> |
|                          | AW        | 0.51 $\pm$ 0.57 <sup>a</sup> |
| Storage flavour          | C         | 1.25 $\pm$ 1.39 <sup>b</sup> |
|                          | T         | 4.41 $\pm$ 1.10 <sup>a</sup> |
|                          | AW        | 3.27 $\pm$ 1.81 <sup>a</sup> |
| Other flavour            | C         | 1.24 $\pm$ 1.98 <sup>a</sup> |
|                          | T         | 0.97 $\pm$ 2.02 <sup>a</sup> |
|                          | AW        | 2.79 $\pm$ 2.42 <sup>a</sup> |
| Smoked meat odour        | C         | 6.85 $\pm$ 0.80 <sup>a</sup> |
|                          | T         | 5.49 $\pm$ 1.62 <sup>b</sup> |
|                          | AW        | 7.31 $\pm$ 0.90 <sup>a</sup> |
| Dried meat odour         | C         | 4.43 $\pm$ 1.27 <sup>a</sup> |
|                          | T         | 3.62 $\pm$ 1.86 <sup>a</sup> |
|                          | AW        | 4.57 $\pm$ 1.13 <sup>a</sup> |

|                 |    |                         |
|-----------------|----|-------------------------|
| Spicy odour     | C  | 1.55±1.45 <sup>a</sup>  |
|                 | T  | 4.45±2.01 <sup>b</sup>  |
|                 | AW | 2.96±1.58 <sup>ab</sup> |
| Fatty odour     | C  | 2.48±1.73 <sup>a</sup>  |
|                 | T  | 2.82±1.85 <sup>a</sup>  |
|                 | AW | 3.09±0.95 <sup>a</sup>  |
| Other odour     | C  | 2.03±1.93 <sup>a</sup>  |
|                 | T  | 1.43±1.92 <sup>a</sup>  |
|                 | AW | 2.77±2.28 <sup>a</sup>  |
| Ton of colour   | C  | 6.80±1.32 <sup>b</sup>  |
|                 | T  | 5.79±1.37 <sup>a</sup>  |
|                 | AW | 6.62±1.15 <sup>b</sup>  |
| Fat visible     | C  | 8.70±1.07 <sup>ab</sup> |
|                 | T  | 9.18±0.90 <sup>b</sup>  |
|                 | AW | 8.15±1.07 <sup>a</sup>  |
| Juiciness       | C  | 7.21±1.28 <sup>ab</sup> |
|                 | T  | 8.02±1.17 <sup>b</sup>  |
|                 | AW | 6.85±1.49 <sup>a</sup>  |
| Overall quality | C  | 5.59±1.17 <sup>a</sup>  |
|                 | T  | 5.75±0.99 <sup>a</sup>  |
|                 | AW | 5.06±1.01 <sup>a</sup>  |

<sup>a-c</sup> Means followed by the different lower case letters between the treatments at the same storage time ( $P < 0.05$ ); C - control bacon with the nitrite curing mixture (99.5% NaCl, 0.5% NaNO<sub>2</sub>); T- bacon with the nitrate curing mixture (99.5% NaCl, 0.5% NaNO<sub>3</sub>) and AW- bacon with acid whey and NaCl;
